# Supplementary material for: Differential but complementary roles of HIF-1α and HIF-2α in the regulation of bone homeostasis
Source: PubMed Central journal article supplement (PMC11263705; doi:10.1038/s42003-024-06581-z), 2024-07-23
Supplement: 42003_2024_6581_MOESM2_ESM.pdf [file 42003_2024_6581_MOESM2_ESM.pdf]

**Supplemental Information**

1               **Differential but complementary roles of HIF-1 $\alpha$  and HIF-2 $\alpha$  in the regulation of**  
2                                               **bone homeostasis**

3

4 Sun Young Lee<sup>1†</sup>, Su-Jin Kim<sup>1,2†</sup>, Ka Hyon Park<sup>1,2</sup>, Gyuseok Lee<sup>1</sup>, Youngsoo Oh<sup>1</sup>, Je-Hwang  
5 Ryu<sup>1,2\*</sup>, and Yun Hyun Huh<sup>3\*</sup>

6

Supplementary Figure 1, 2, 3 and 4

Supplementary Table 1

7

1

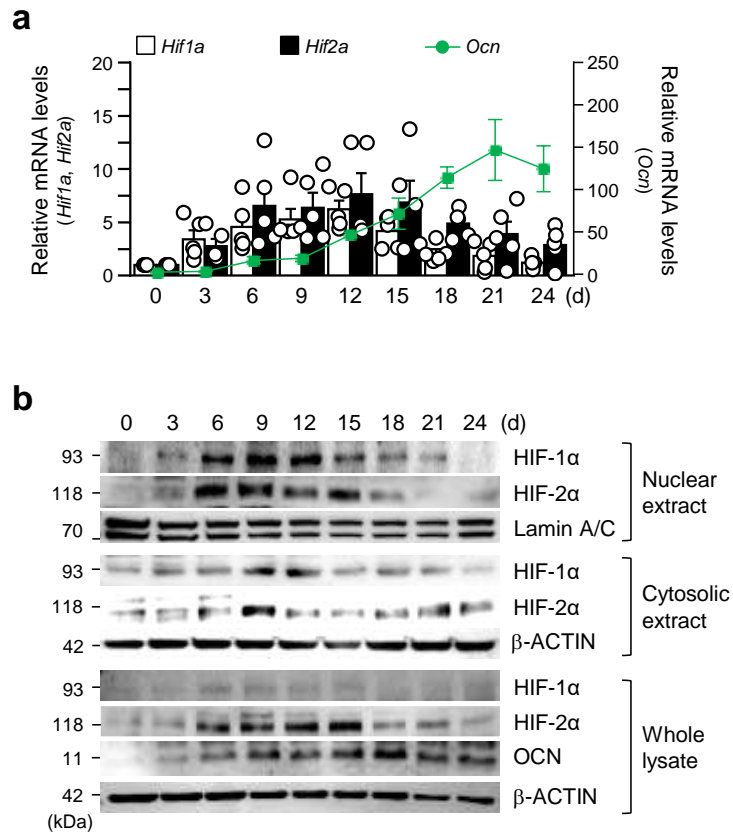

2

3

4 **Supplementary Fig. 1 *Hif1a* is up-regulated during osteoblast differentiation. a, b** Primary  
5 calvarial pre-steoblasts isolated from WT mice were cultured in the DM. Relative transcript  
6 levels of *Hif1a*, *Hif2a*, and *Ocn* at indicated culture day (0-24 days) were determined by qRT-  
7 PCR ( $n = 5$ ) (**a**). The protein levels and nuclear translocation were determined by western  
8 blotting ( $n = 3$ ) (**b**).

**a**

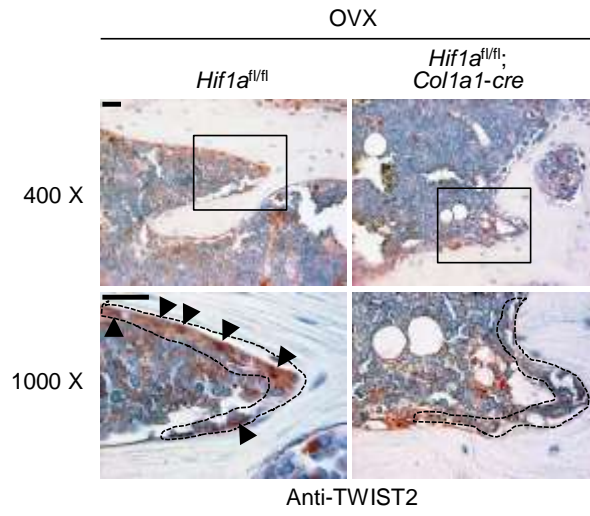

**b**

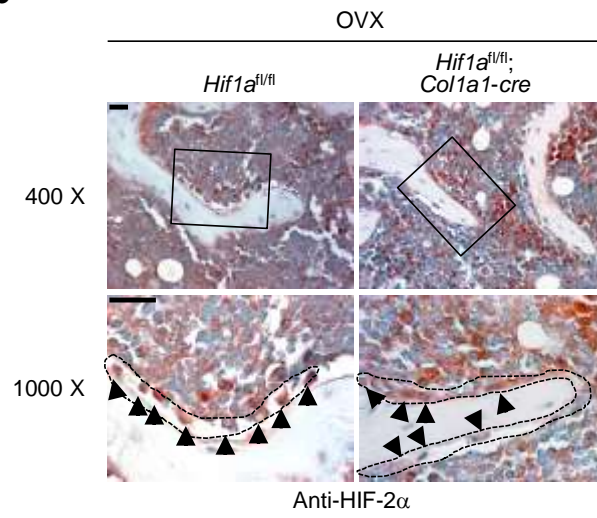

**c**

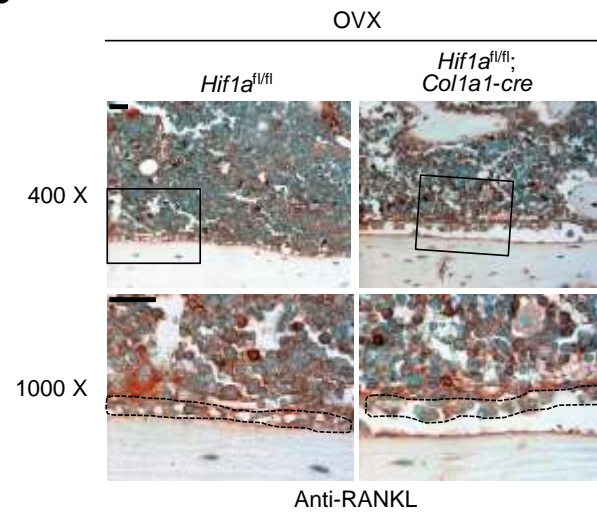

1 **Supplementary Fig. 2 Representative images of immunohistochemical staining in bone**  
2 **tissue from OVX model in *Hif1a<sup>fl/fl</sup>* and *Hif1a<sup>fl/fl</sup>;Colla1-Cre* mice. a-c** Representative  
3 mouse femur sections stained TWIST2 **(a)**, HIF-2a **(b)**, and RANKL **(c)**. The lower panel  
4 images are the enlarged frames of the upper panel. The dotted lines indicate osteoblasts, and  
5 the nuclear positively stained osteoblasts in brown are indicated by arrows.

6

7

8

9

10

11

12

13

14

15

16

17

18

19

20

1

**Figure 2h**

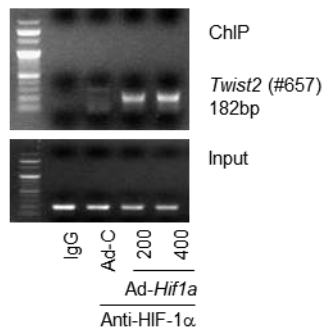

**Figure 5a**

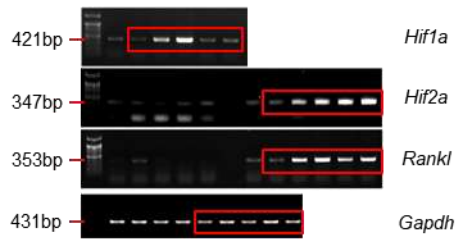

**Figure 5b**

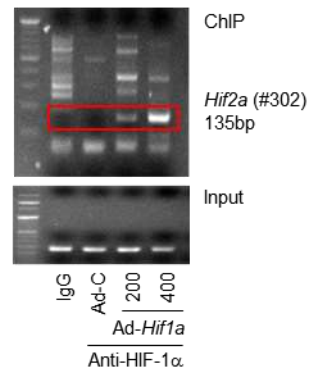

2

3 **Supplementary Fig. 3 Unedited/uncropped gel for main figures.**

4

## Supplementary Figure 1b

Nuclear extract

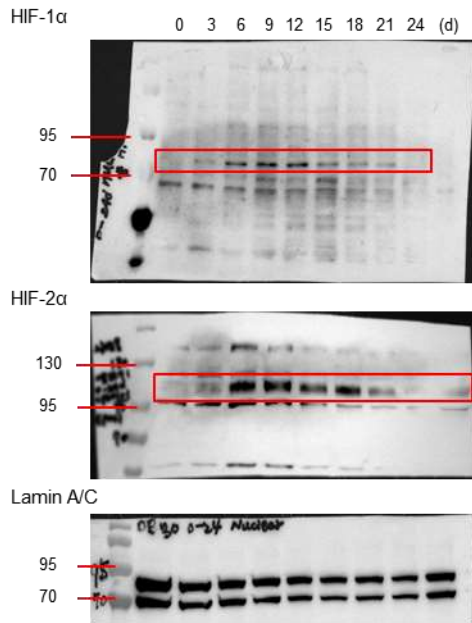

Cytosolic extract

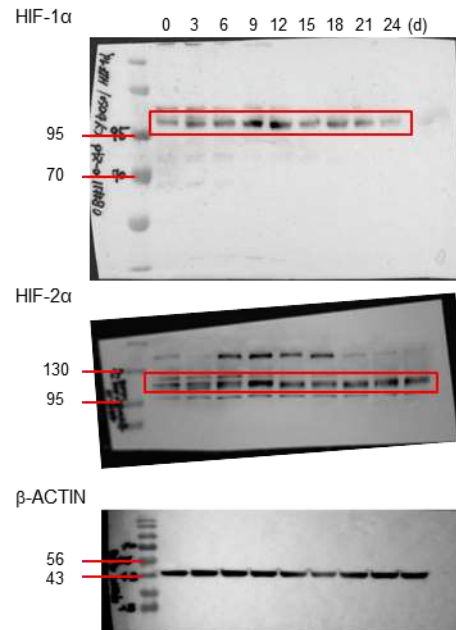

Whole lysate

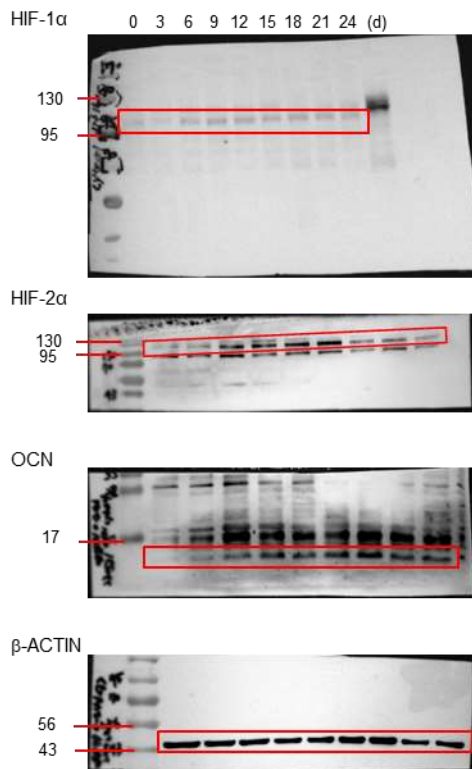

1

2 **Supplementary Fig. 4 Unedited/uncropped western blots for supplementary figures.**

1 **Supplementary Table 1** PCR primers and conditions

| Gene          | Strand          | Sequences (5'-3')           | Size (bp) | <sup>a</sup> AT (°C) |
|---------------|-----------------|-----------------------------|-----------|----------------------|
| <i>Alp</i>    | <sup>b</sup> S  | TACACCACAACACGGGCGAGGAGAC   | 356       | 60                   |
|               | <sup>c</sup> As | CCTCTGGTGGCATCTCGTTATCCG    |           |                      |
| <i>Hif1a</i>  | S               | AGGCTCACCATCAGTTATTTACGTGTG | 421       | 60                   |
|               | As              | TAGACATGAATATGGCCCGTGCAGTG  |           |                      |
| <i>Hif2a</i>  | S               | AGAAGAGCAAAGACGTGTCCACCGAG  | 347       | 63                   |
|               | As              | GTAGAACTCATAGGCAGAGCGTCCAAG |           |                      |
| <i>Ocn</i>    | S               | CTCCTGAGAGTCTGACAAAGCCTT    | 320       | 55                   |
|               | As              | GCTGTGACATCCATTACTTGC       |           |                      |
| <i>Opg</i>    | S               | CTTGCCCTGACCACTCTTATACGG    | 359       | 60                   |
|               | As              | CGTTGTCATGTGTTGCATTTCTTTC   |           |                      |
| <i>Rankl</i>  | S               | GACTCGACTCTGGAGAGTGAAGAC    | 353       | 60                   |
|               | As              | AATGTTGGCGTACAGGTAATAGAAG   |           |                      |
| <i>Runx2</i>  | S               | GCCACCTTTACCTACACCCC        | 363       | 55                   |
|               | As              | GACTCATCCATTCTGCCGCT        |           |                      |
| <i>Twist1</i> | S               | TGAGCAACAGCGAGGAGGAG        | 417       | 60                   |
|               | As              | GCCAGTTTGAGGGTCTGAATC       |           |                      |
| <i>Twist2</i> | S               | GGCCGCCAGGTACATAGAC         | 103       | 60                   |
|               | As              | GTAGCTGAGACGCTCGAGA         |           |                      |
| <i>Gapdh</i>  | S               | TCACTGCCACCCAGAAGA          | 431       | 60                   |
|               | As              | TGTAGGCCATGAGGTCCA          |           |                      |
| <i>Twist2</i> | S               | CCAACACTCAGGGCAAGGTC        | 182       | 60                   |
| ChIP          | As              | CTCGGGCCAGTATGCAAGTTG       |           |                      |

*Hif2a* S AATCGCCCCCACCCCAAGAC

ChIP As CAATTGCGGAGAAAGCACGG

135 60

---

1 <sup>a</sup>AT, annealing temperature; <sup>b</sup>S, sense primer; <sup>c</sup>As, antisense primer

2
