# Supplementary material for: Differential but complementary roles of HIF-1α and HIF-2α in the regulation of bone homeostasis
Source: PubMed Central journal article supplement (PMC11263705; doi:10.1038/s42003-024-06581-z), 2024-07-23
Supplement: 42003_2024_6581_MOESM3_ESM.pdf [file 42003_2024_6581_MOESM3_ESM.pdf]

## Description of Additional Supplementary Files

**File name:** Supplementary Data 1

**Description:** Source Data used to generate the main figures
